# Supplementary material for: Matrix mechanics regulates epithelial defence against cancer by tuning dynamic localization of filamin
Source: Research Square preprint supplement (doi:10.21203/rs.3.rs-93643/v1), 2020-10-26
Supplement: Supplementary file 1 [file aa42fbcd03c323f6841ff0c9.pdf]

## Supplementary Information

### **Matrix mechanics regulates epithelial defence against cancer by tuning dynamic localization of filamin**

Pothapragada *et al.*

This document contains:

1. Supplementary Table 1: Composition of compliant polyacrylamide gels with different stiffness.
2. Supplementary Table 2: Antibody information
3. Supplementary Table 3. Plasmid information
4. Supplementary Video Legends
5. Supplementary Figure Legends
6. Supplementary Figures 1-4

**Supplementary Table 1. Composition of compliant polyacrylamide gels with different stiffness.**

| <b>Stiffness (Young's Modulus)</b> | <b>1.2 kPa</b> | <b>4 kPa</b> | <b>11 kPa</b> | <b>23 kPa</b> | <b>35 kPa</b> | <b>90 kPa</b> |
|------------------------------------|----------------|--------------|---------------|---------------|---------------|---------------|
| <b>milli-Q H<sub>2</sub>O (μl)</b> | 820            | 807          | 697           | 695           | 650           | 542           |
| <b>40% acrylamide (μl)</b>         | 137            | 125          | 250           | 187           | 200           | 300           |
| <b>2% bis-acrylamide (μl)</b>      | 25             | 50           | 35            | 100           | 132           | 140           |
| <b>Fluorescent beads (μl)</b>      | 12             | 12           | 12            | 12            | 12            | 12            |
| <b>10% APS (μl)</b>                | 5.75           | 5.75         | 5.75          | 5.75          | 5.75          | 5.75          |
| <b>TEMED (μl)</b>                  | 0.25           | 0.25         | 0.25          | 0.25          | 0.25          | 0.25          |

**Supplementary Table 2. Antibody information**

| Antibodies/Fluorophore                                                          | Catalog No.          | Manufacturer | Dilution/Working concentration        |
|---------------------------------------------------------------------------------|----------------------|--------------|---------------------------------------|
| DAPI (4',6-diamidino-2-phenylindole)                                            | D1306                | Invitrogen   | 1 $\mu\text{g ml}^{-1}$               |
| Alexa-Fluor-647 Phalloidin                                                      | 8940                 | CST          | 1:40                                  |
| Alexa-Fluor-555 Phalloidin                                                      | 8953S                | CST          | 1:40                                  |
| Mouse anti-FilaminA (monoclonal)                                                | F6682, clone PM6/317 | Sigma        | 1:100                                 |
| Rabbit anti-HA-tag (monoclonal)                                                 | 3724S, clone C29F4   | CST          | 1:800                                 |
| anti-FLAG-M2 (monoclonal)                                                       | F1804                | Sigma        | 1:500                                 |
| Rabbit anti-Cofilin (monoclonal)                                                | 5175S, clone D3F9    | CST          | 1:200                                 |
| Rabbit anti-pMLC2(Ser19)                                                        | 3671                 | CST          | 1:50                                  |
| Mouse polyclonal anti-DNMBP (anti-Tuba)                                         | ab88534              | Abcam        | 1:200                                 |
| Alexa Fluor Plus 594 donkey anti-mouse IgG secondary antibody                   | A32744               | Invitrogen   | Same as per primary antibody dilution |
| AlexaFluor 488, Goat anti-Mouse IgG (H+L) Cross-Adsorbed Secondary Antibody     | A-11001              | Invitrogen   | Same as per primary antibody dilution |
| Alexa Fluor 488, Goat anti-Rabbit IgG (H+L) Cross-Adsorbed Secondary Antibody   | A-11008              | Invitrogen   | Same as per primary antibody dilution |
| Anti-rabbit IgG (H+L), F(ab') <sub>2</sub> Fragment (Alexa Fluor®555 Conjugate) | 4413S                | CST          | Same as per primary antibody dilution |
| Anti-rabbit IgG (H+L), F(ab') <sub>2</sub> Fragment (Alexa Fluor-647 Conjugate) | 4414S                | CST          | Same as per primary antibody dilution |

**Supplementary Table 3. Plasmid information**

| Plasmid                 | Source          | Identifier                   | Comment                                                            |
|-------------------------|-----------------|------------------------------|--------------------------------------------------------------------|
| pcDNA4/TO/GFP-RasV12    | Yasuyuki Fujita | DOI: 10.1038/ncb1853         | Tetracycline-inducible HRas <sup>V12</sup> expression              |
| Cortactin-pmCherryC1    | Addgene         | 27676                        | Cytoskeletal protein                                               |
| FusionRed-Fascin-C-10   | Addgene         | 56117                        | Cytoskeletal protein                                               |
| mApple-Alpha-Actinin-19 | Addgene         | 54865                        | Cytoskeletal protein                                               |
| mCherry-ARP3-C-12       | Addgene         | 54981                        | Cytoskeletal protein                                               |
| mCherry-VASP-5          | Addgene         | 55151                        | Cytoskeletal protein                                               |
| mEmerald-N-Wasp-C-18    | Addgene         | 54199                        | Cytoskeletal protein                                               |
| YFP-mDia2               | Addgene         | 25420                        | Cytoskeletal protein                                               |
| pECE-M2-BAIAP2 wt       | Addgene         | 31656                        | Cytoskeletal protein                                               |
| mApple-FilaminA-N-9     | Addgene         | 54901                        | Filamin overexpression                                             |
| mApple-N1               | Addgene         | 54567                        | Destination vector for mutant sequence                             |
| mApple-C1               | Addgene         | 54631                        | Destination vector for mutant sequence                             |
| FAM101B-HA              | This work       | N/A                          | Human FAM101B and mScarlet cloned into pcDNA3.1+/C-HA              |
| mApple-dnFLNA           | This work       | DOI: 10.1073/pnas.1104211108 | Human FLNA Repeat [19-22]-HA cloned into mApple-C1                 |
| mApple-dnFAM101B        | This work       | DOI: 10.1073/pnas.1104211108 | Human FAM101B $\Delta$ BD2 cloned into mApple-N1                   |
| pcdna nesprin TS        | Addgene         | 68127                        | Nesprin tensor sensor                                              |
| pcdna nesprin HL        | Addgene         | 68128                        | Nesprin headless control                                           |
| mApple-dnNesprin1       | This work       | DOI: 10.1242/jcs.02471       | aa. 8369-8749 of human Nesprin-1 cloned into mApple-C1             |
| mApple-dnLaminB1        | This work       | PMID: 11683386               | XLaminB1 $\Delta$ 2+ (34-420 aa from X06344) cloned into mApple-C1 |
| Raichu-Cdc42            | Kyoto Univ.     | Raichu-1054X                 | Cdc42 FRET-biosensor                                               |
| LifeAct-TagGFP2         | iBidi GmbH      | 60101                        | F-actin binding peptide                                            |

## Supplementary Video Legends

**Supplementary Video 1. Extrusion of HRas<sup>V12</sup>-expressing cells by normal cells post-induction with doxycycline.** HRas<sup>V12</sup>-expression was induced by doxycycline and tracked up to 23 hours by taking images at 1 hr interval. *Top panels*: DIC images; *bottom panels*: fluorescence images.

**Supplementary Video 2. Dynamics of photo-converted mEos2-filamin molecules on soft ECM.** mEos2-filamin cell interfacing with an HRas<sup>V12</sup> cell was stimulated and tracked for 180 seconds. This video corresponds to the snapshots showed in Fig. 2f, *top panels*, on soft ECM.

**Supplementary Video 3. Dynamics of photo-converted mEos2-filamin molecules on stiff ECM.** mEos2-filamin cell interfacing with an HRas<sup>V12</sup> cell was stimulated and tracked for 180 seconds. This video corresponds to the snapshots showed in Fig. 2f, *bottom panels*, on stiff ECM.

## Supplementary Figure Legends

**Supplementary Figure 1. Extrusion of MDCK-GFP-HRas<sup>V12</sup>-transformed cells co-cultured with MDCK-WT cells.** **a.** Illustration detailing the used experimental epithelial monolayer model of EDAC. **b.** Representative DIC images of MDCK-WT:MDCK-GFP-HRas<sup>V12</sup> mosaic monolayer (*top row*), fluorescence images of GFP-HRas<sup>V12</sup> expressing cells (*bottom row*). From left to right: snapshots of GFP-HRas<sup>V12</sup> expressing cells at different time points post-induction with doxycycline. hpi: hour post-induction. One representative extruding colony of transformed cells encircled (dotted-white circle). Scale bars, 60µm. **c.** Scatter bar plots depicting the fraction of GFP-HRas<sup>V12</sup>-expressing colonies extruded over substrates of varying stiffness at 4 hpi. The number of colonies counted is indicated inside each bar. Data are mean±s.e.m. collected over 3 independent biological replicates. Statistical significance was assessed using Mann-Whitney t-test (two-tailed).

**Supplementary Figure 2. ECM-stiffness dependent intracellular localization of actin-binding proteins.** **a-g.** Fluorescence images of MDCK-WT cells transiently transfected with Cortactin\_pmCherry (**a**), FusionRed\_Fascin (**b**), mApple-alpha-Actinin (**c**), mCherry-ARP3 (**d**), mCherry-VASP (**e**), mEmerald-N-WASP (**f**) and YFP-mDia2 (**g**). **h** Immunofluorescence images of MDCK-WT cells transiently transfected with BAIAP2-M2 and stained with anti-M2. **i,j** Immunofluorescence images of MDCK-WT monolayers stained with anti-cofilin (**i**) or anti-pMLC (**j**). **a-j** Top panels: Soft ECM; Bottom panels: Stiff ECM. Nucleus stained with DAPI. Scale bars, 10µm.

**Supplementary Figure 3. ECM stiffness-dependent differential localization and dynamics of filamin.** **a.** Immunofluorescence images of MDCK-WT cells immunostained for filamin cultured on soft (4 kPa, *top panels*) and stiff (90 kPa, *bottom panels*) ECM. Perinuclear and interfacial regions traced manually for quantifying mean fluorescence intensities. Representative grayscale images with traced-out ROIs displayed for cells cultured on soft (*top*) and stiff (*bottom*). Schematic showing the manual ROIs (red) used within each cell for perinuclear and interfacial regions. **b.** Immunofluorescence images of MDCK-WT cells culture on soft (4 kPa) and stiff (90 kPa) ECM stained with anti-FilaminA and AlexaFluor555-Phalloidin. Yellow arrowhead points to perinuclear co-localization of filamin and F-actin on stiff ECM. **c.** Photobleaching in mApple-FLNA cells cultured on soft (*top panel*) or stiff ECM (*middle and bottom panels*). White dotted-box indicates the photobleached regions: cell-cell interface (*top*, soft ECM), cell-cell interface (*middle*, stiff ECM) and perinuclear region (*bottom*, stiff ECM). Scale bars: 10 µm. Kymographs

for the dotted regions shown followed by the schematic depicting the differential and dynamic recovery of filamin. **d.** FRAP curve that depicts the recovery of mApple-FLNA post photobleaching at the ROIs used in (c).

**Supplementary Figure 4. FAM101B and perinuclear cytoskeleton regulate perinuclear localization of filamin.** **a.** Immunofluorescence images of MDCK-WT monolayer transfected with FAM101B-HA and stained with anti-HA and anti-Filamin, on soft (*top panels*) and stiff (*bottom panels*) substrates. Magnified view of boxed region shown in third panels. FAM101B-HA co-localizes with filamin to perinuclear region on stiff substrate. **b.** Nesprin tension sensor (Nesprin-TS) expressed in MDCK-WT cells cultured on soft (*top panels*) and stiff (*bottom panels*) substrates. The schematic underneath shows the construct, where the tension sensor module comprising of mTFP1 and mVenus FRET pair has been inserted between the actin binding domain and SUN binding domain of Nesprin. Increased force increases the distance between the FRET-pair causing a decrease in the FRET index. (*Right*) Box-and-whisker plot showing significant reduction of FRET index in cells cultured on stiff substrate, indicative of high LINC complex tension. **c.** Schematic representations of dominant-negative mutant constructs used. **d-g.** Immunofluorescence images of mApple-dnFLNA-MDCK cells (**d**), MDCK-mApple-dnFAM101B cells (**e**), mApple-dnNesprin1-MDCK cells (**f**), mApple-dnLaminB1-MDCK (**g**) stained with anti-filamin and corresponding grayscale images with traced-out ROIs displayed for cells cultured on stiff ECM. ROIs used for quantification of the fraction of filamin localization at perinuclear versus interfacial regions. Scale bars, 10 $\mu$ m.

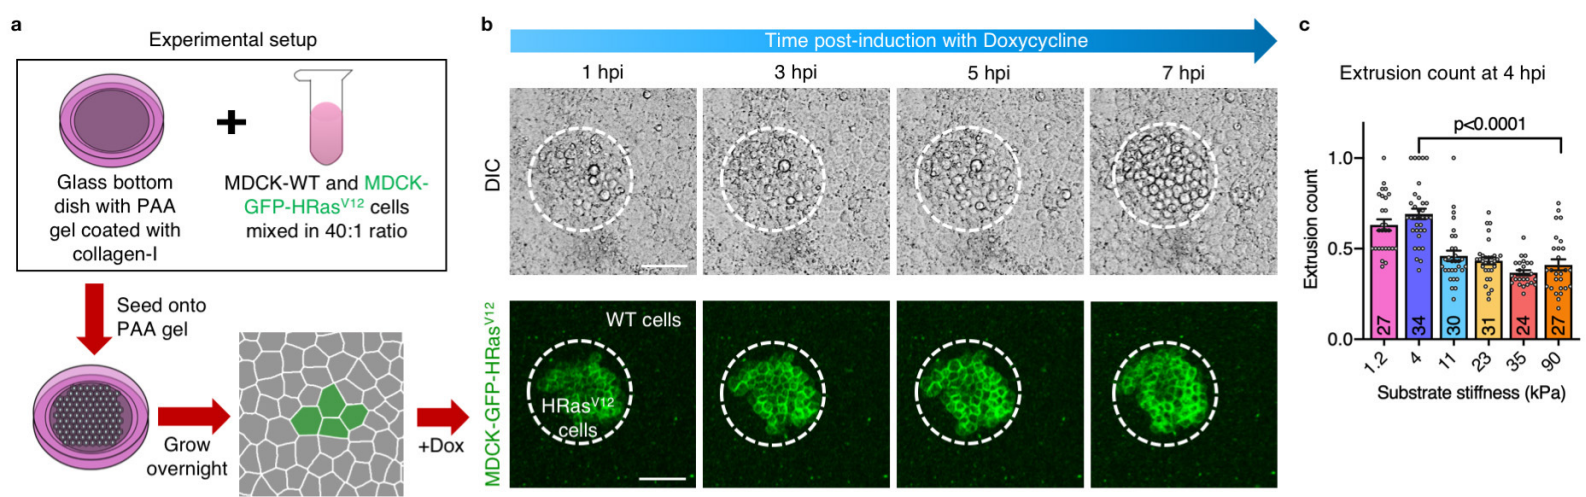

**Supplementary Figure 1. Pothapragada *et al.***



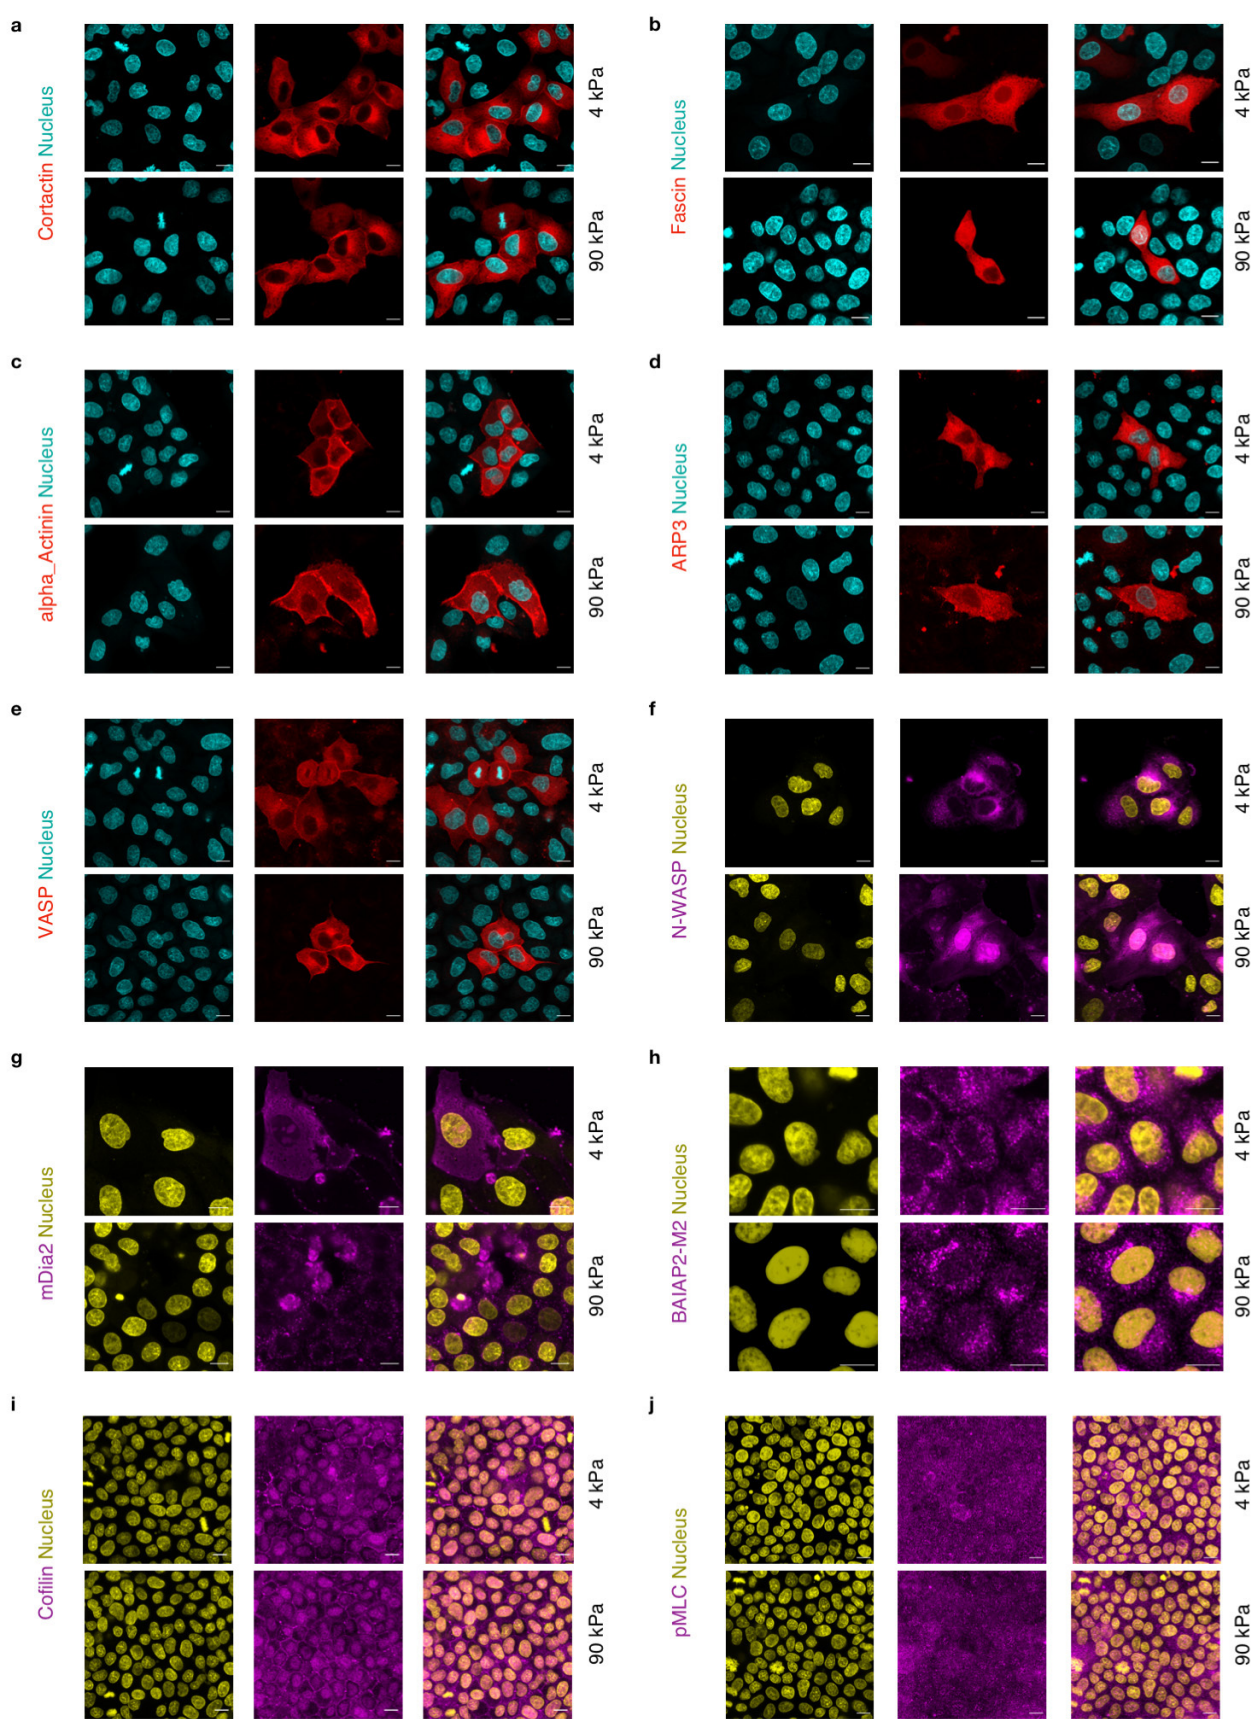

**Supplementary Figure 2. Pothapragada *et al.***



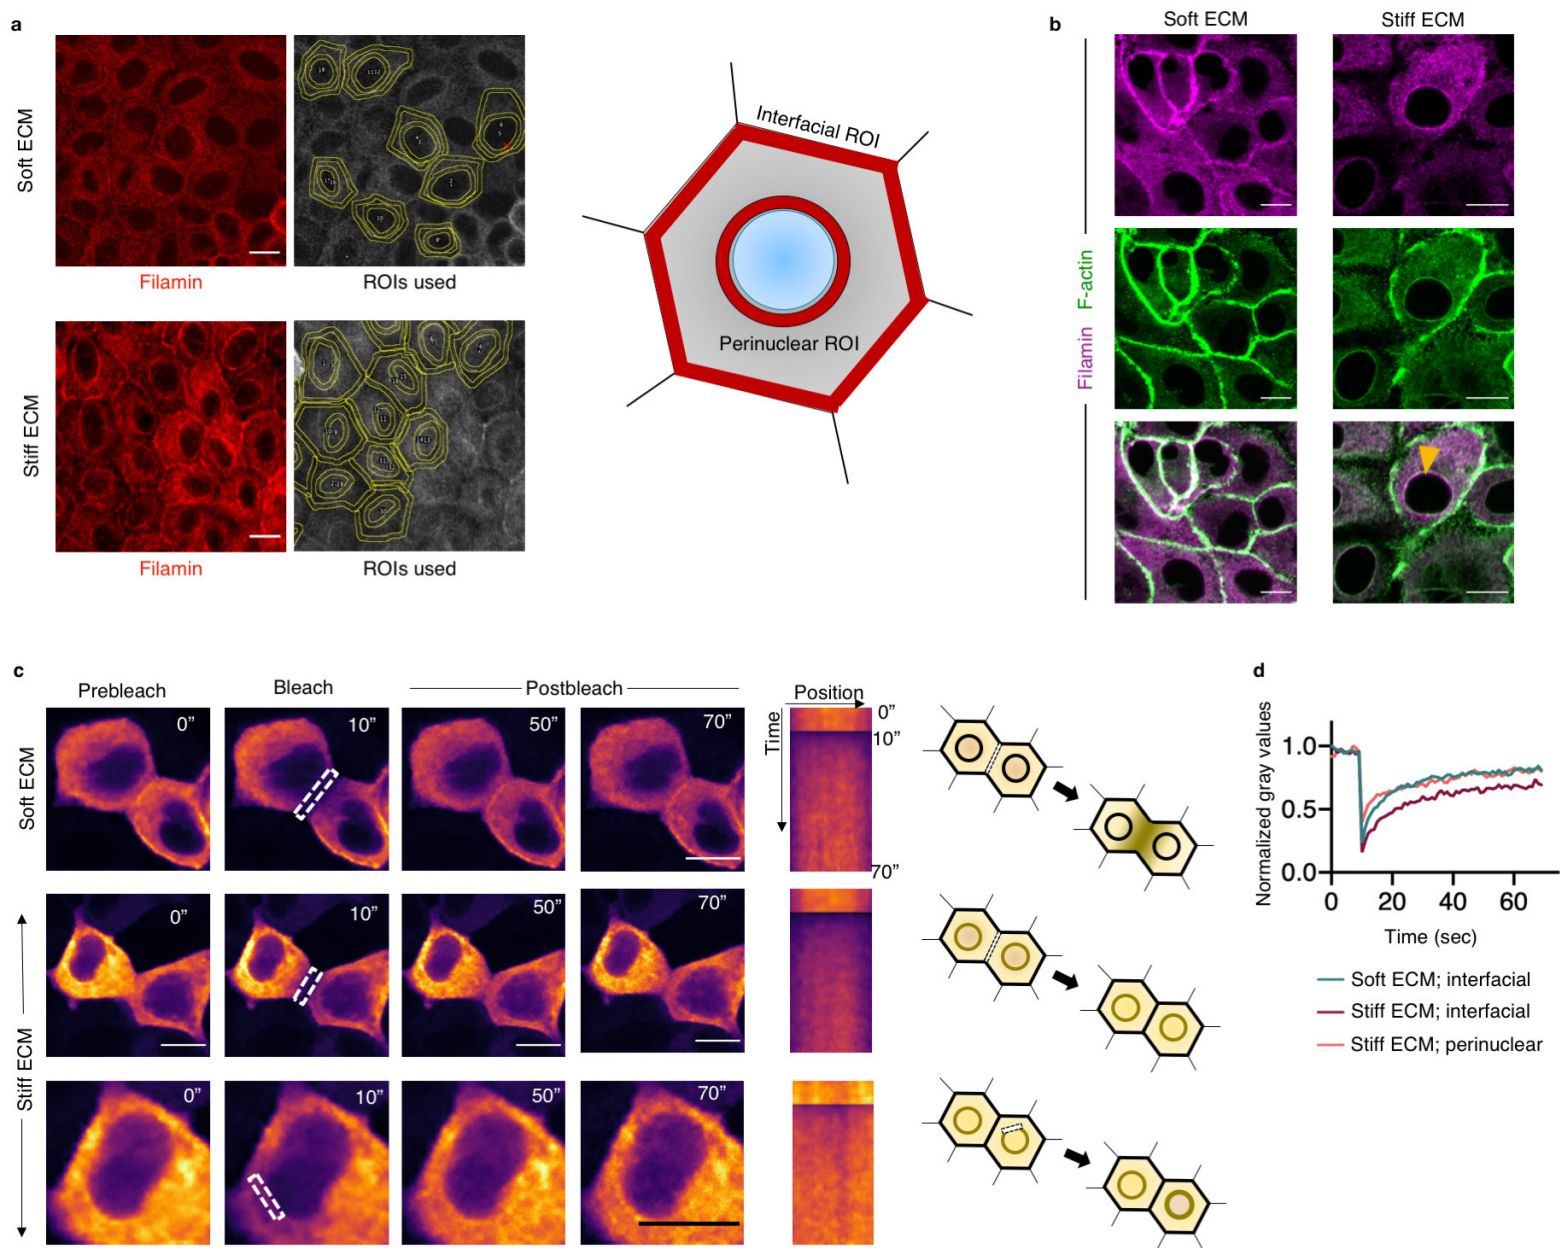

**Supplementary Figure 3. Pothapragada *et al.***

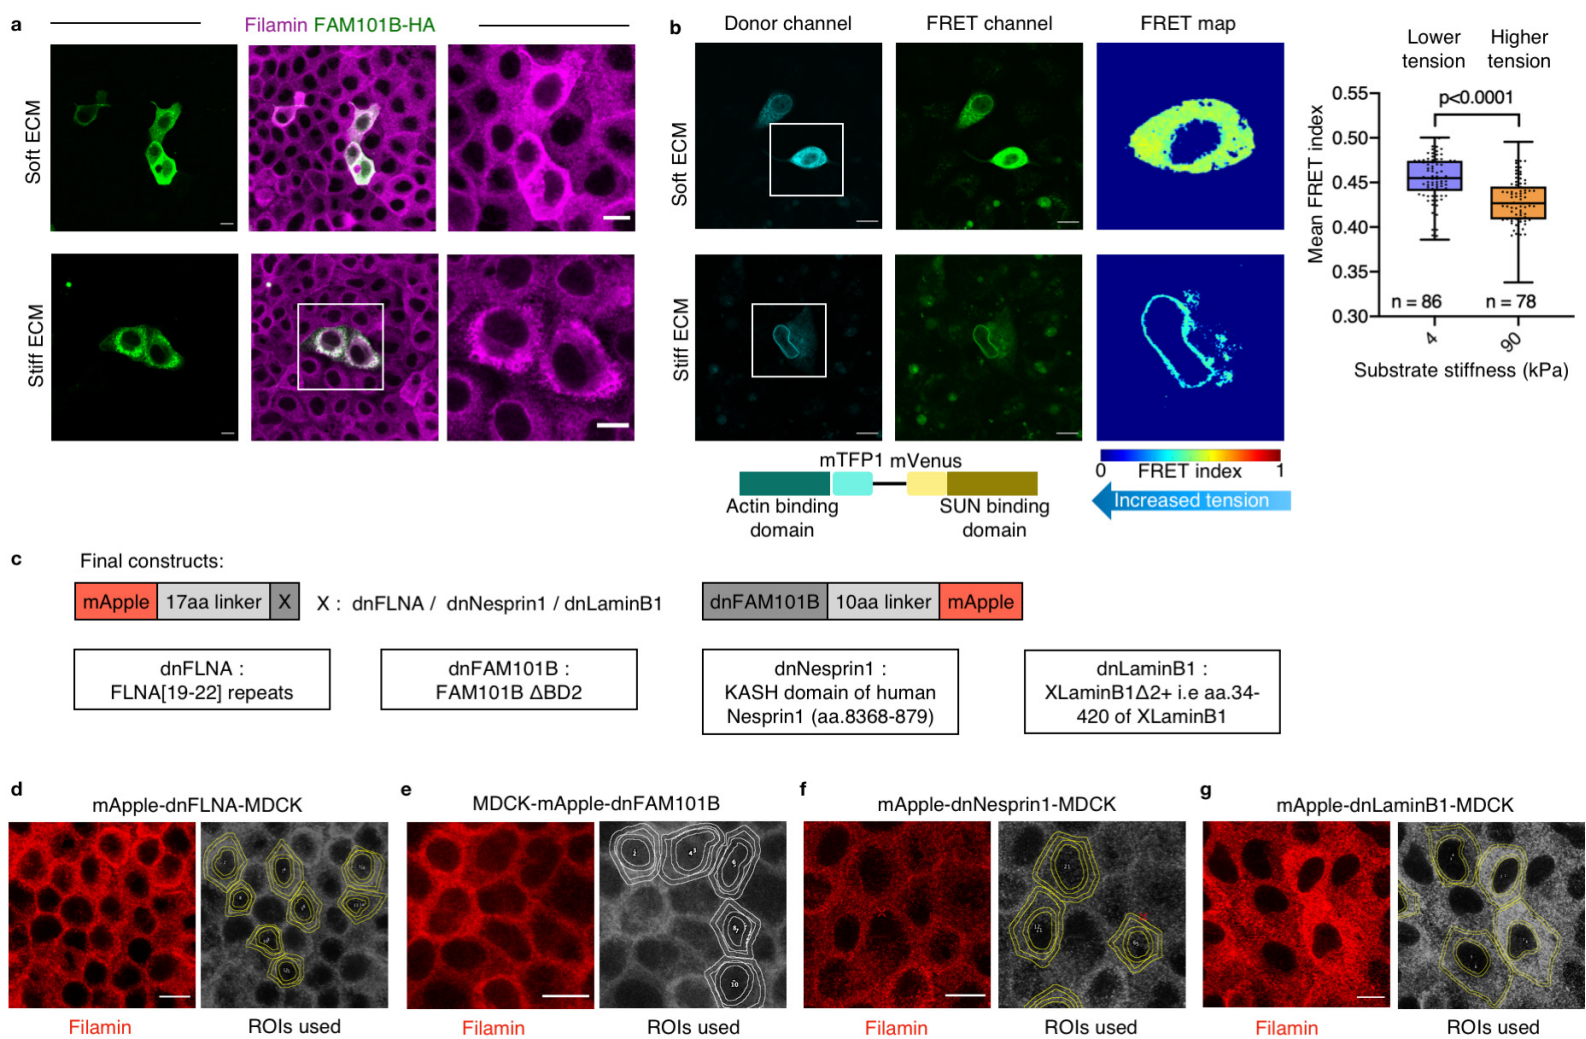

**Supplementary Figure 4. Pothapragada *et al.***
